# Supplementary material for: Lattice-tailored low-temperature processed electron transporting materials boost the open-circuit voltage of planar CsPbBr3 perovskite solar cells up to 1.654 V
Source: Royal Society of Chemistry journal article supplement (doi:10.1039/d0ta04366d), 2020-01-01
Supplement: d0ta04366d1.pdf [file d0ta04366d1.pdf]

**Electronic supplementary information**

**Lattice-Tailored Low-Temperature Processed Electron Transporting Materials Boost the  
Open-Circuit Voltage of Planar CsPbBr<sub>3</sub> Solar Cells up to 1.654 V**

Yafeng Xu,<sup>a</sup> Jialong Duan,<sup>a,\*</sup> Xiya Yang,<sup>a</sup> Jian Du,<sup>a</sup> Yudi Wang,<sup>a</sup> Yanyan Duan,<sup>b</sup> Qunwei Tang<sup>a,\*</sup>

<sup>a</sup> Institute of New Energy Technology, College of Information Science and Technology, Jinan  
University, Guangzhou 510632, PR China;

<sup>b</sup> State Centre for International Cooperation on Designer Low-Carbon and Environmental Material  
(SCICDLCEM), School of Materials Science and Engineering, Zhengzhou University, Zhengzhou  
450001, PR China;

\* Correspondence author: duanjialong@jnu.edu.cn; tangqunwei@jnu.edu.cn

**Table S1** Summary of the photovoltaic parameters of single-junction solar cells with high  $V_{oc}$ .

| Device structure                                                                                                                     | $J_{sc}$<br>(mA cm <sup>-2</sup> ) | $V_{oc}$<br>(V) | FF<br>(%) | PCE<br>(%) | Ref. |
|--------------------------------------------------------------------------------------------------------------------------------------|------------------------------------|-----------------|-----------|------------|------|
| FTO/c-TiO <sub>2</sub> /CsPbBr <sub>3</sub> /spiro-MeOTAD/Au                                                                         | 5.65                               | 1.536           | 62.4      | 5.42       | S1   |
| ITO/NiO/CH <sub>3</sub> NH <sub>3</sub> PbBr <sub>3</sub> /ICBA/PrC60MA/Ag                                                           | 5.13                               | 1.50            | 69.5      | 5.35       | S2   |
| ITO/PEDOT:PSS/CH <sub>3</sub> NH <sub>3</sub> PbBr <sub>3</sub> /ICBA/Ca/Al                                                          | 6.04                               | 1.61            | 77        | 7.50       | S3   |
| FTO/c-TiO <sub>2</sub> /m-TiO <sub>2</sub> /GQD/CsPbBr <sub>3</sub> /Carbon                                                          | 8.12                               | 1.458           | 82.1      | 9.72       | S4   |
| FTO/c-TiO <sub>2</sub> /m-TiO <sub>2</sub> /CsPb <sub>0.97</sub> Sm <sub>0.03</sub> Br <sub>3</sub> /Carbon                          | 7.48                               | 1.594           | 85.1      | 10.14      | S5   |
| FTO/c-TiO <sub>2</sub> /m-TiO <sub>2</sub> /CsPb <sub>0.97</sub> Sm <sub>0.03</sub> Br <sub>3</sub> /Cu(Cr,Ba)O <sub>2</sub> /Carbon | 7.81                               | 1.615           | 85.5      | 10.79      | S6   |
| FTO/c-TiO <sub>2</sub> /m-TiO <sub>2</sub> /CsPbBr <sub>3</sub> /MnS/Carbon                                                          | 8.28                               | 1.52            | 83        | 10.45      | S7   |
| FTO/c-TiO <sub>2</sub> /CsPbBr <sub>3</sub> /spiro-MeOTAD/Ag                                                                         | 9.78                               | 1.498           | 74.47     | 10.91      | S8   |
| FTO/c-TiO <sub>2</sub> /CsPbBr <sub>3</sub> /Carbon                                                                                  | 7.37                               | 1.545           | 82.2      | 9.35       | S9   |
| FTO/c-TiO <sub>2</sub> /m-TiO <sub>2</sub> /CsPbBr <sub>3</sub> /CuInS <sub>2</sub> /ZnS<br>QDs/LPP-Carbon                           | 7.73                               | 1.626           | 86.3      | 10.85      | S10  |
| FTO/SnO <sub>2</sub> /TiO <sub>x</sub> Cl <sub>4-2x</sub> /Cs <sub>0.91</sub> Rb <sub>0.09</sub> PbBr <sub>3</sub> /Carbon           | 7.96                               | 1.629           | 80.5      | 10.44      | S11  |

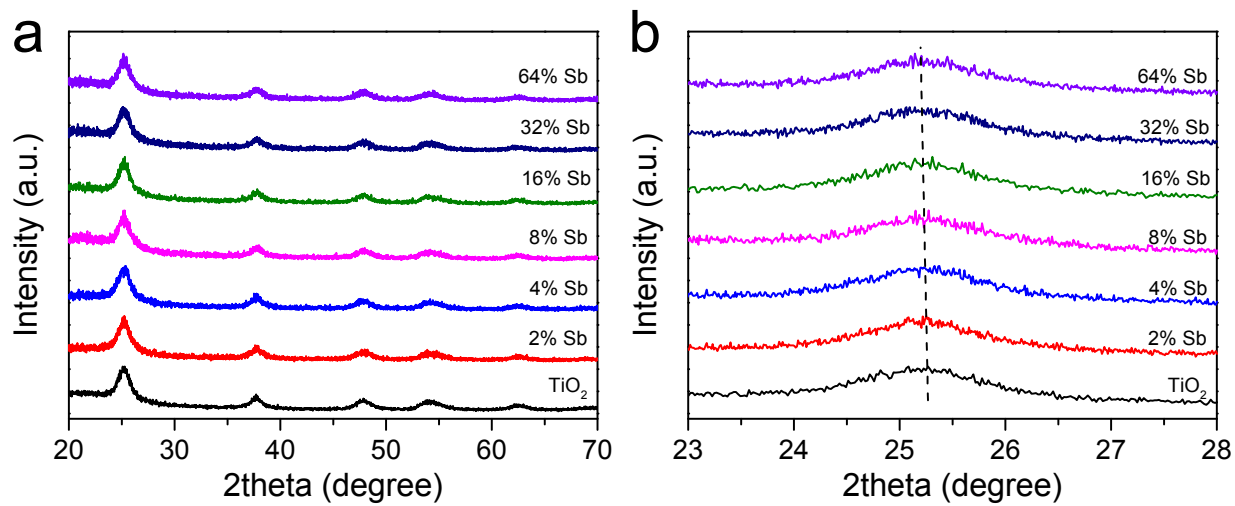

**Fig. S1** XRD patterns of Sb-doped TiO<sub>2</sub> nanocrystals with different Sb dosages in precursor solution.

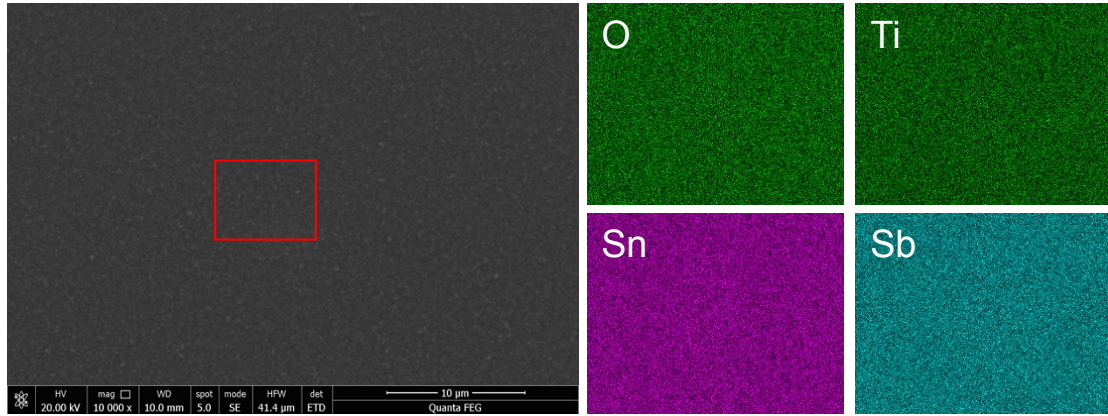

**Fig. S2** Top-view image of the Sb-TiO<sub>2</sub> film deposited on FTO substrate and the corresponding elemental mapping images.

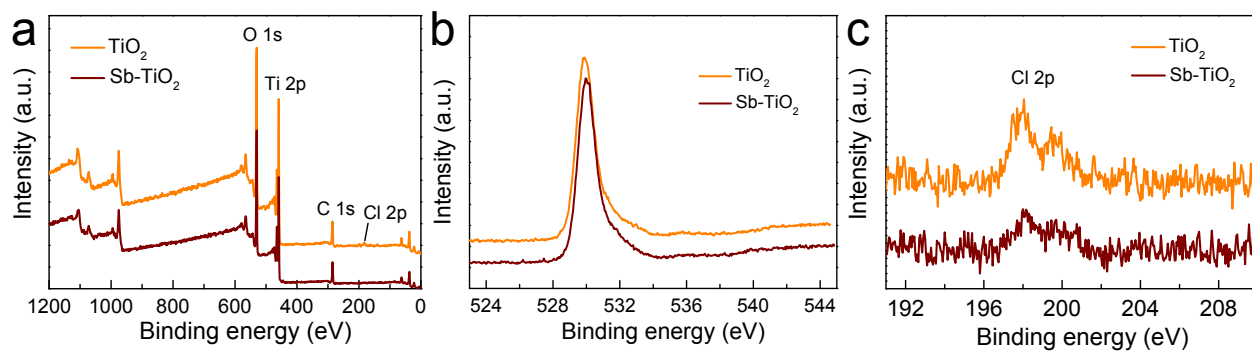

**Fig. S3** (a) XPS spectra of TiO<sub>2</sub> films with and without Sb dopant. High-resolution XPS spectra of (b) Sb 3d and (c) Cl 2p core level.

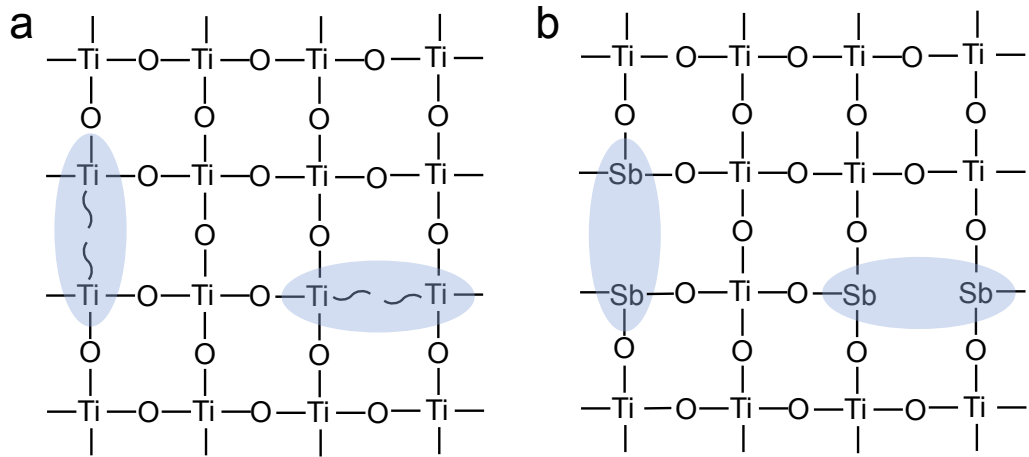

**Fig. S4** (a) Defects in the pristine TiO<sub>2</sub>, (b) Sb<sup>3+</sup> substitution at the Ti<sup>3+</sup> sites passivates oxygen vacancy defects.

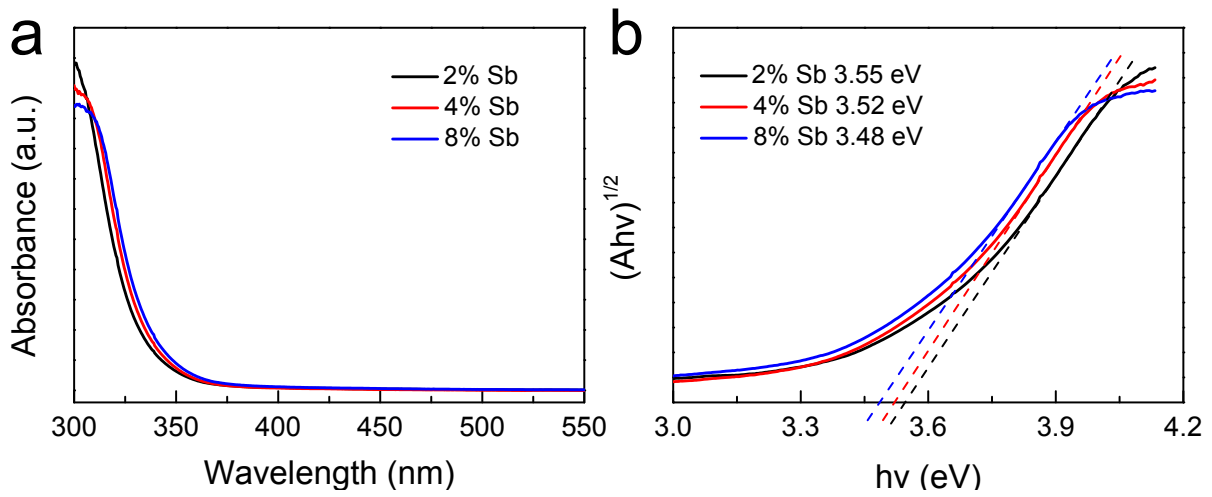

**Fig. S5** UV-vis absorption spectra and corresponding bandgaps of Sb-doped TiO<sub>2</sub> films with increased Sb dosages in precursor solution.

**Table S2** Electrical parameters of the TiO<sub>2</sub> and Sb-TiO<sub>2</sub> films

| ETL                 | $\sigma$ (mS cm <sup>-1</sup> ) | $\mu$ (cm <sup>2</sup> V <sup>-1</sup> s <sup>-1</sup> ) | $n_t$ (cm <sup>-3</sup> ) |
|---------------------|---------------------------------|----------------------------------------------------------|---------------------------|
| TiO <sub>2</sub>    | $1.19 \times 10^{-3}$           | $5.44 \times 10^{-4}$                                    | $3.15 \times 10^{17}$     |
| Sb-TiO <sub>2</sub> | $1.99 \times 10^{-3}$           | $6.58 \times 10^{-4}$                                    | $2.67 \times 10^{17}$     |



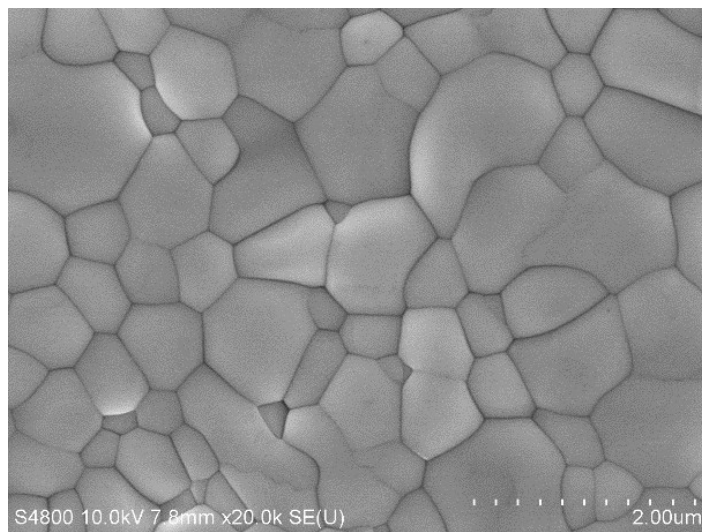

**Fig. S6** Top-view SEM image of CsPbBr<sub>3</sub> film deposited on traditional mesoporous TiO<sub>2</sub> substrate.

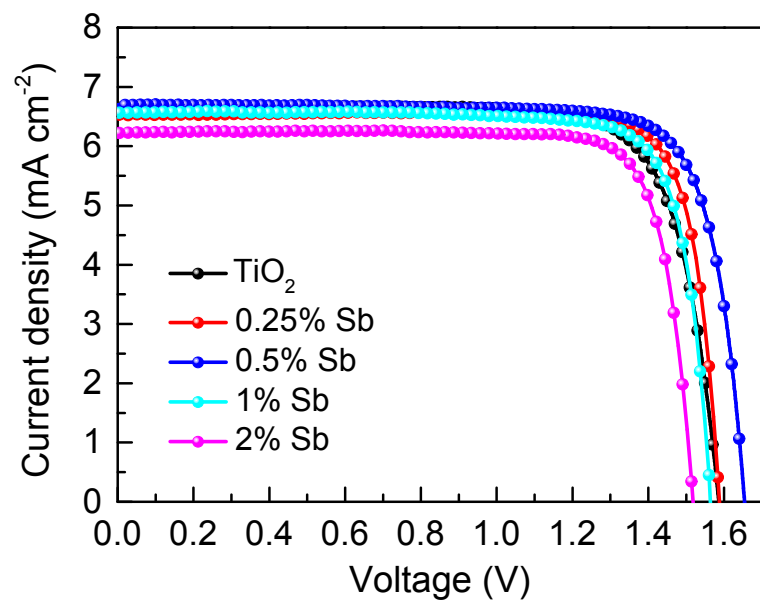

**Fig. S7**  $J$ - $V$  curves of CsPbBr<sub>3</sub> solar cells based on TiO<sub>2</sub> and Sb-doped TiO<sub>2</sub> with different doping amounts.

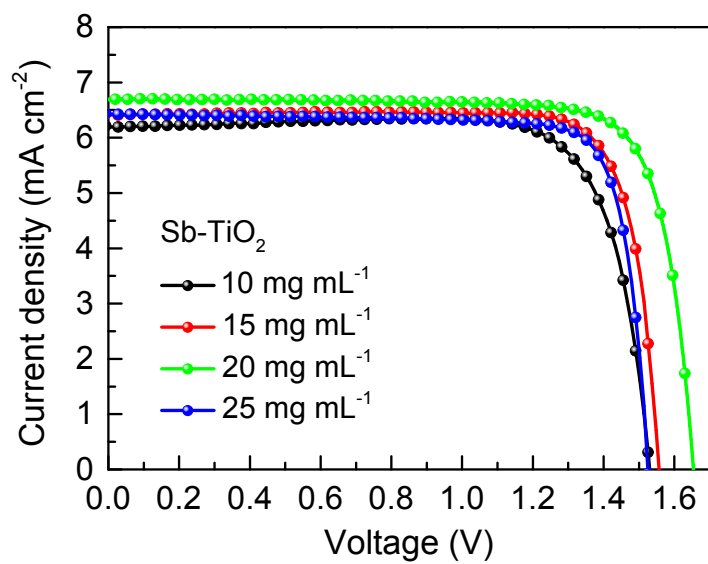

**Fig. S8** *J-V* curves of CsPbBr<sub>3</sub> solar cells based on Sb-TiO<sub>2</sub> with different Sb-TiO<sub>2</sub> dispersion concentrations.

**Table S3** Photovoltaic parameters of inorganic CsPbBr<sub>3</sub> PSCs based on TiO<sub>2</sub> and Sb-doped TiO<sub>2</sub> ETLs.

| device           | $V_{oc}$ (V) | $J_{sc}$ (mA cm <sup>-2</sup> ) | $FF$ (%) | PCE (%) |
|------------------|--------------|---------------------------------|----------|---------|
| TiO <sub>2</sub> | 1.586        | 6.64                            | 78.4     | 8.26    |
| 0.25% Sb         | 1.584        | 6.52                            | 83.4     | 8.62    |
| 0.5% Sb          | 1.654        | 6.70                            | 80.4     | 8.91    |
| 1% Sb            | 1.560        | 6.56                            | 81.5     | 8.35    |
| 2% Sb            | 1.515        | 6.23                            | 82.3     | 7.77    |

**Table S4** Photovoltaic parameters of inorganic CsPbBr<sub>3</sub> PSCs based on Sb-TiO<sub>2</sub> ETLs at different Sb-TiO<sub>2</sub> dispersion concentrations.

| Concentration          | $V_{oc}$ (V) | $J_{sc}$ (mA cm <sup>-2</sup> ) | $FF$ (%) | PCE (%) |
|------------------------|--------------|---------------------------------|----------|---------|
| 10 mg mL <sup>-1</sup> | 1.526        | 6.18                            | 79.1     | 7.48    |
| 15 mg mL <sup>-1</sup> | 1.554        | 6.41                            | 82.4     | 8.22    |
| 20 mg mL <sup>-1</sup> | 1.654        | 6.70                            | 80.4     | 8.91    |
| 25 mg mL <sup>-1</sup> | 1.522        | 6.42                            | 82.1     | 8.03    |

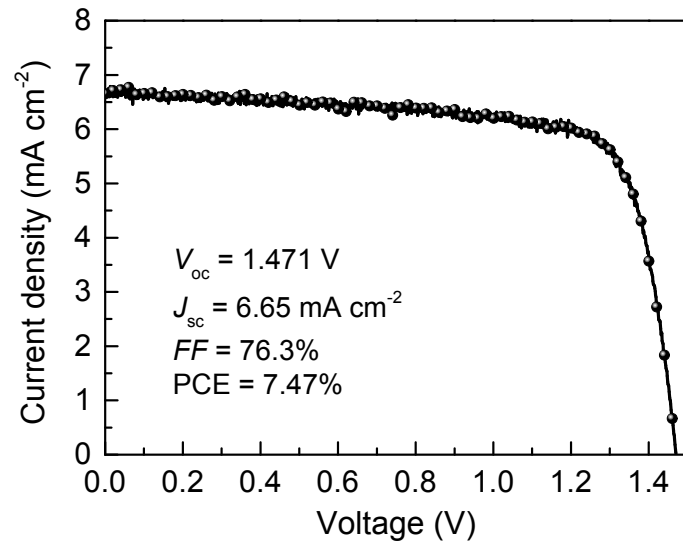

**Fig. S9**  $J$ - $V$  curve of inorganic  $\text{CsPbBr}_3$  PSC based on the high-temperature processed  $\text{TiO}_2$  ETL.

**Table S5** Photovoltaic parameters of inorganic CsPbBr<sub>3</sub> PSCs based on TiO<sub>2</sub> and Sb doped TiO<sub>2</sub> with  $V_{oc}$  over 1.6 V.

| device              | $V_{oc}$ (V) | $J_{sc}$ (mA cm <sup>-2</sup> ) | $FF$ (%) | PCE (%) |
|---------------------|--------------|---------------------------------|----------|---------|
| TiO <sub>2</sub> -1 | 1.606        | 6.37                            | 76.5     | 7.83    |
| TiO <sub>2</sub> -2 | 1.607        | 6.49                            | 77.0     | 8.02    |
| TiO <sub>2</sub> -3 | 1.608        | 5.90                            | 83.5     | 7.92    |
| 0.25% Sb-1          | 1.619        | 6.52                            | 80.3     | 8.47    |
| 0.25% Sb-2          | 1.609        | 6.22                            | 80.1     | 8.02    |
| 0.25% Sb-3          | 1.630        | 6.22                            | 75.8     | 7.69    |
| 0.5% Sb-1           | 1.652        | 6.44                            | 78.4     | 8.34    |
| 0.5% Sb-2           | 1.629        | 6.47                            | 75.3     | 7.94    |
| 0.5% Sb-3           | 1.654        | 6.70                            | 80.4     | 8.91    |
| 0.5% Sb-4           | 1.616        | 6.46                            | 79.5     | 8.29    |
| 0.5% Sb-5           | 1.604        | 6.25                            | 81.4     | 8.17    |
| 0.5% Sb-6           | 1.606        | 6.20                            | 85.4     | 8.50    |
| 0.5% Sb-7           | 1.608        | 5.92                            | 80.7     | 7.69    |
| 0.5% Sb-8           | 1.617        | 6.55                            | 83.6     | 8.85    |
| 0.5% Sb-9           | 1.624        | 6.56                            | 80.0     | 8.52    |
| 0.5% Sb-10          | 1.603        | 6.34                            | 79.5     | 8.07    |
| 0.5% Sb-11          | 1.611        | 5.64                            | 84.4     | 7.67    |
| 0.5% Sb-12          | 1.603        | 5.66                            | 85.0     | 7.71    |

---

|            |       |      |      |      |
|------------|-------|------|------|------|
| 0.5% Sb-13 | 1.604 | 6.34 | 82.5 | 8.39 |
|------------|-------|------|------|------|

---



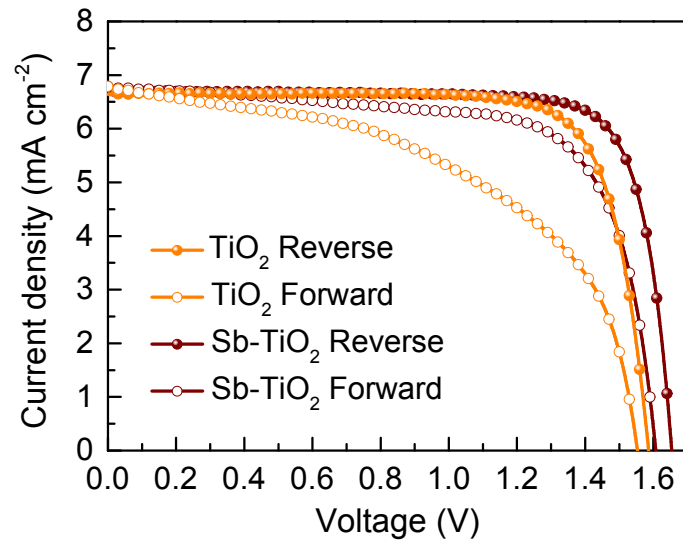

**Fig. S10** *J-V* curves of the optimized inorganic CsPbBr<sub>3</sub> PSCs based on TiO<sub>2</sub> and Sb-TiO<sub>2</sub> under forward and reverse scan directions.

**Table S6** Photovoltaic parameters of optimized inorganic CsPbBr<sub>3</sub> PSCs based on TiO<sub>2</sub> and Sb-TiO<sub>2</sub> under forward and reverse scan directions.

| device                      | $V_{oc}$ (V) | $J_{sc}$ (mA cm <sup>-2</sup> ) | FF (%) | PCE (%) |
|-----------------------------|--------------|---------------------------------|--------|---------|
| TiO <sub>2</sub> Reverse    | 1.586        | 6.64                            | 78.4   | 8.26    |
| TiO <sub>2</sub> Forward    | 1.553        | 6.79                            | 51.8   | 5.46    |
| Sb-TiO <sub>2</sub> Reverse | 1.654        | 6.70                            | 80.4   | 8.91    |
| Sb-TiO <sub>2</sub> Forward | 1.607        | 6.79                            | 70.4   | 7.68    |

**Table S7** TRPL decay lifetimes of CsPbBr<sub>3</sub> films on TiO<sub>2</sub> and Sb-TiO<sub>2</sub> coated FTO substrates.  $\tau_1$  and  $\tau_2$  correspond to the slow and fast decay components, respectively.

| Samples                                  | $\tau_1$ (ns) | A <sub>1</sub> (%) | $\tau_2$ (ns) | A <sub>2</sub> (%) | $\tau_{ave}$ (ns) |
|------------------------------------------|---------------|--------------------|---------------|--------------------|-------------------|
| TiO <sub>2</sub> /CsPbBr <sub>3</sub>    | 0.88          | 58.5               | 10.53         | 41.5               | 1.42              |
| Sb-TiO <sub>2</sub> /CsPbBr <sub>3</sub> | 0.49          | 67.6               | 8.66          | 32.4               | 0.71              |

## References

- S1. Q. A. Akkerman, M. Gandini, F. Di Stasio, P. Rastogi, F. Palazon, G. Bertoni, J. M. Ball, M. Prato, A. Petrozza and L. Manna, *Nat. Energy*, 2016, **2**, 16194.
- S2. S. Chen, Y. Hou, H. Chen, M. Richter, F. Guo, S. Kahmann, X. Tang, T. Stubhan, H. Zhang, N. Li, N. Gasparini, C. O. R. Quiroz, L. S. Khanzada, G. J. Matt, A. Osvet and C. J. Brabec, *Adv. Energy Mater.*, 2016, **6**, 1600132.
- S3. C. G. Wu, C. H. Chiang and S. H. Chang, *Nanoscale*, 2016, **8**, 4077.
- S4. J. Duan, Y. Zhao, B. He and Q. Tang, *Angew. Chem. Int. Ed.*, 2018, **57**, 3787.
- S5. J. Duan, Y. Zhao, X. Yang, Y. Wang, B. He and Q. Tang, *Adv. Energy Mater.*, 2018, **8**, 1802346.
- S6. J. Duan, Y. Zhao, Y. Wang, X. Yang and Q. Tang, *Angew. Chem. Int. Ed.*, 2019, **58**, 16147.
- S7. X. Li, Y. Tan, H. Lai, S. Li, Y. Chen, S. Li, P. Xu and J. Yang, *ACS Appl. Mater. Interfaces*, 2019, **11**, 29746.
- S8. G. Tong, T. Chen, H. Li, L. Qiu, Z. Liu, Y. Dang, W. Song, L. K. Ono, Y. Jiang and Y. Qi, *Nano Energy*, 2019, **65**, 104015.
- S9. T. Xiang, Y. Zhang, H. Wu, J. Li, L. Yang, K. Wang, J. Xia, Z. Deng, J. Xiao, W. Li, Z. Ku, F. Huang, J. Zhong, Y. Peng and Y.-B. Cheng, *Sol. Energy Mater. Sol. Cells*, 2019, **206**, 110317.
- S10. J. Duan, Y. Wang, X. Yang and Q. Tang, *Angew. Chem. Int. Ed.*, 2020, **59**, 4391.
- S11. Q. Zhou, J. Duan, Y. Wang, X. Yang and Q. Tang, *J. Energy Chemistry*, 2020, **50**, 1.
